# Supplementary material for: A1AT dysregulation of metabolically stressed hepatocytes by Kupffer cells drives MASH and fibrosis
Source: Springer Nature journal article supplement (doi:10.1038/s12276-025-01408-1), 2025-02-12
Supplement: MOESM1 [file 12276_2025_1408_MOESM1_ESM.pdf]

## Supplementary Materials for

### **A1AT dysregulation of metabolically stressed hepatocytes by Kupffer cells drives MASH and fibrosis**

Jeong-Su Park<sup>1,†</sup>, Jin Lee<sup>2,†</sup>, Feng Wang<sup>1,†</sup>, Hwan Ma<sup>1,†</sup>, Zixiong Zhou<sup>3</sup>, Yong-Sun Lee<sup>4</sup>, Kwangyeon Oh<sup>1</sup>,  
Haram Lee<sup>8</sup>, Guoyan Sui<sup>1</sup>, Sangkyu Lee<sup>5</sup>, Yoon Mee Yang<sup>6</sup>, Jang-Won Lee<sup>7</sup>, Yong-Ha Ji<sup>7</sup>, Chun-Woong  
Park<sup>1</sup>, Hwan-Soo Yoo<sup>1</sup>, Bang-Yeon Hwang<sup>1</sup>, Sang-Bae Han<sup>1</sup>, Nan Song<sup>1</sup>, Soohwan Oh<sup>8</sup>, Bumseok Kim<sup>9</sup>,  
Ekihiro Seki<sup>10</sup>, Jin Tae Hong<sup>1,\*,#</sup>, Yoon Seok Roh<sup>1,\*,#</sup>

Correspondence to: [ysroh@cbnu.ac.kr](mailto:ysroh@cbnu.ac.kr) and [jinthong@chungbuk.ac.kr](mailto:jinthong@chungbuk.ac.kr)

#### **This file includes:**

Materials and Methods  
Supplementary Figures 1 to 8  
Raw Data from Secretome Proteomics Analysis  
Supplementary Tables 1 and 2

## **Supplementary Materials and Methods**

### **Sex as a Biological Variable**

#### *Animal Study*

In our study using C57Bl/6 mice to explore chronic fatty liver disease, sex was identified as a crucial variable, with male mice showing more susceptibility to the disease due to diet-induced weight gain, reduced locomotion with high-fat diets, and impaired glucose tolerance<sup>1,2</sup>. These findings highlight the importance of considering sex in the study of disease mechanisms, though the protective factors in female mice also merit attention.

#### *Human Study*

The examination of human serum and tissue samples included both male and female subjects without finding significant sex-based differences in disease markers. This suggests that, within the scope of our analysis, chronic fatty liver disease manifests similarly across sexes, emphasizing the value of inclusive research designs to capture the full spectrum of disease impact.

### **Primary hepatocytes (HPs) isolation from murine liver**

Mice were anesthetized with 30 mg/kg tiletamine/zolazepam (Zoletil®; Vibrac Laboratories, Cat. 8E3HA), and a catheter (24G) was inserted into the inferior vena cava (IVC). The liver was perfused with 30 ml of isolation buffer, comprising 138 mM NaCl (Sigma-Aldrich, Cat. 7647-14-5), 5.4 mM KCl (Sigma-Aldrich, Cat. 7447-40-7), 10 mM HEPES (Sigma-Aldrich, Cat. 7365-45-9), 4.2 mM NAHCO<sub>3</sub> (Sigma-Aldrich, Cat. 144-55-8), 0.6 mM NaH<sub>2</sub>PO<sub>4</sub>.H<sub>2</sub>O (Sigma-Aldrich, Cat. 10049-21-5), 0.8 mM Na<sub>2</sub>HPO<sub>4</sub> (Sigma-Aldrich, Cat. 7558-79-4), 0.5 mM EGTA (Sigma-Aldrich, Cat. 99590-86-0), and 5 mM glucose (Sigma-Aldrich, Cat. 50-99-7). The perfusion solution was maintained at 40°C using a Masterflex L/S easy-load II (Cole-Parmer Instrument Co., Cat. EW-77200-60). Subsequently, the liver was perfused with 75 ml of an enzyme buffer solution containing collagenase type 1 (650 µg/ml; Worthington, Cat. LS004197) and collagenase P (50 µg/ml; Roche, Cat. 11213865001). Once successful cannulation was confirmed, a cut was made at the hepatic portal vein to drain the perfusate. The liver was dissected after perfusion was completed, minced well, and filtered through a 100 µm filter; after two washes in enzyme buffer solution, the hepatocytes were resuspended in a complete M199 medium.

### **Primary hepatocytes (HPs) Isolation from marmoset liver**

Fresh marmoset liver was obtained from KBIO HEALTH OSONG Medical Innovation Foundation (KBIO-IACUC-2023-044-6). For the isolation of primary marmoset hepatocytes, the liver, including the portal vein, was carefully excised. The liver was then perfused with 100 ml of an isolation buffer containing 1 mg/ml collagenase type I for 10 minutes to facilitate enzymatic digestion. After perfusion, the liver tissue was dissected, finely minced, and passed through a 100  $\mu$ m filter to obtain a cell suspension. The hepatocytes were washed twice with the enzyme buffer solution to remove any residual debris. Finally, the isolated hepatocytes were resuspended in complete M199 medium for further use.

### **Primary hepatic stellate cells (HSCs) and non-parenchymal cells (NPCs) isolation**

Mice were anesthetized with 30 mg/kg tiletamine/zolazepam, and a 27G catheter was inserted into the IVC. The liver was perfused with 30 ml of EGTA solution maintained at 40°C using Masterflex L/S easy-load II. Thereafter, the liver was sequentially perfused with 30 ml of an enzyme buffer solution containing pronase (100  $\mu$ g/ml; Roche, Cat. 11459643001) and 25 ml of an enzyme buffer solution containing collagenase type 1 (250  $\mu$ g/ml). Once successful cannulation was confirmed, a cut was made at the hepatic portal vein to allow for drainage of the perfusate. The liver was dissected following complete perfusion and incubated for 20 min in secondary digestion solution (enzyme buffer solution containing collagenase type 1 [500  $\mu$ g/ml], pronase [500  $\mu$ g/ml], and DNase1 [20  $\mu$ g/ml; Biosesang, Cat. DF1027-250-00]). The digested liver solution was centrifuged, and the supernatant was added to a new 50 ml tube with a cell strainer (70  $\mu$ m). The mixture was centrifuged and resuspended in 10 ml of washing solution containing DNase I. The volume was made up to 30 ml with washing solution, followed by the addition of 15 ml of 34.5% Nycodenz solution (final concentration, 11.5%; Alere Technologies AS, Cat. 1002424). Then, 14.5% Nycodenz solution was prepared, and 4 ml was transferred into six 15 ml tubes. Subsequently, 7.5 ml of cell-Nycodenz suspension was placed onto the 14.5% Nycodenz solution, and the cell-Nycodenz suspension was gently covered with 1 ml of washing solution. The prepared samples were centrifuged at 3000 rpm for 30 min (4°C) without breakage. Then, the first layer (HSCs) of clear washing buffer and the second layer (NPC) were collected and transferred to new 50 ml tubes, and after two washes in washing buffer, HSCs were resuspended in filtered DMEM medium, as described below. NPCs were resuspended in filtered MACS buffer containing 0.5% bovine serum albumin (BSA) and 2 mM EDTA.

### **Purification of F4/80+ KCs**

For F4/80 positive selection, NPCs were incubated with F4/80 antibodies (Invitrogen, Cat. 13-4801-82) at 4°C for 30 min. Cells were washed with MACS buffer twice, followed by the addition of anti-biotin MicroBeads (Miltenyi Biotec, Cat. 130-090-485). Subsequently, cells were incubated at 4°C for another 15 min, followed by positive selection with the LS column and cell collection in the column. KCs were washed twice with MACS buffer and resuspended in a filtered RPMI medium.

### **RNA extraction and real-time polymerase chain reaction**

RNA was extracted from liver tissues and cells using the Hybrid-R kit (Geneall, Cat. 305-101), according to the manufacturer's instructions. The extracted RNA was subjected to reverse transcription using the High-Capacity cDNA Reverse Transcription kit (Applied Biosystems, Cat. 4368813), followed by PCR using a CFX Connect Real-Time PCR System (BIO-RAD). Target gene expression was normalized to the GAPDH expression level, which was used as the internal control. The primers used for all target genes are listed in Supplementary Table 1.

### **Western blotting and immunoprecipitation**

All liver tissue and cell samples were homogenized in radioimmunoprecipitation assay buffer with protease and phosphatase inhibitors (Atto, Cat. WSE-7420). To detect cleavage of IL-32 $\gamma$  by PR3, we employed recombinant proteins for IL-32 $\gamma$  (YbdY, Cat. REC101) and proteinase 3 (Athens Research & Technology, Cat. 16-14-161820). Western blot samples were centrifuged at 12,000 rpm for 10 min. For human serum sample, we utilized Pierce™ Albumin Serum Depletion Kits (Thermo Fisher Scientific, Cat. 89875) to remove excessive albumin and IgG in the sample according to manufacturer's protocol. The protein concentration was measured using the Pierce BCA Protein Assay Kit (Thermo Fisher Scientific, Cat. 23225). Western blot samples were separated by sodium dodecyl sulfate-polyacrylamide gel electrophoresis (SDS-PAGE), which were subsequently transferred to PVDF membranes. The membranes were blocked with 5% skim milk for 1 h at room temperature or with 5% BSA overnight at 4°C. Primary antibodies used were ACTIN (1:1000; Merck, Cat. MAB1501), GAPDH (1:1000; Merk, Cat. AB2302), IL-32 (1:1000; YbdY, Cat. PAB102), PR3 (1:1000; Santa Cruz, Cat. sc-74534), and A1AT (1:1000; ABclonal,

Cat. A1015), along with secondary antibodies. Membrane images were captured using Amersham imager 600 and quantified using ImageJ. For immunoprecipitation, the control and LPS-stimulated CM of THP-1 cells were incubated with the primary antibody of PR3 (Santa Cruz, Cat. sc-74534) overnight at 4°C. The antibody-conjugated samples were pulled down using protein A/G plus agarose (Santa Cruz, Cat. sc-2003). Each pull-down sample was analyzed using the Proteome Profiler Human XL Cytokine Array kit (R&D Systems, Cat. ARY022B). The antibody used for all target proteins are listed in Supplementary Table 2.

### **Plasmid, siRNA, and cell lines**

The IL-32 $\gamma$  plasmid was point-mutated to alanine at the valine 104 site to generate the IL-32 $\gamma$  (V104A) plasmid. pcDNA3.1+ was used as an internal control vector. Hif1a, Hnf4a, and negative siRNA were purchased from Integrated DNA Technologies. All plasmid and siRNA transfections were performed using Lipofectamine 3000 (Invitrogen, Cat. L3000001). The immortalized mouse KC line was purchased from Sigma-Aldrich (Cat. SCC119). The HepG2 cell line was purchased from the Korean Cell Line Bank, Korea (KCLB No. 88065). ONGHEPA1<sup>3</sup>, mouse hepatic stellate cell line, was provided by Osteoneurogen, Inc.

### **RNA-seq and data analysis**

For murine RNA sequencing results of primary hepatocytes, a cDNA library was constructed using the QuantSeq 3' mRNA-Seq Library Prep Kit (Lexogen) according to the manufacturer's instructions. Briefly, each RNA sample and oligo-dT primer containing an Illumina-compatible sequence at its 5' end was hybridized, followed by reverse transcription. After degradation of the RNA template, second-strand synthesis was initiated by a random primer containing an Illumina-compatible linker sequence at its 5' end. The double-stranded DNA library was purified using magnetic beads. For cluster generation, the library was amplified to add complete adapter sequences. The final product of the library was purified using PCR components. High-throughput sequencing was performed as single-end 75 sequencing using a NextSeq 550 (Illumina).

QuantSeq 3 mRNA-Seq reads were aligned using Bowtie2. Bowtie2 indices were either generated from the genome assembly sequence or representative transcript sequences for alignment to the genome and transcriptome. The alignment file was used to assemble transcripts, estimate their abundance, and detect the differential gene expression. Differentially expressed

genes were determined based on counts from unique and multiple alignments using coverage in Bedtools. The read count data were processed using the TMM+CPM normalization method using EdgeR within R and Bioconductor. Gene classification was based on searches performed using DAVID (<http://david.abcc.ncifcrf.gov/>) and Medline databases (<http://www.ncbi.nlm.nih.gov/>). Data mining and graphic visualization were performed using ExDEGA (Ebiogen Inc.).

### **GEO database analysis**

We explored the Gene Expression Omnibus (GEO) datasets related to human MASLD patients on the NCBI database. We analyzed datasets GSE48452, GSE61260, and GSE135251, each of which contained comprehensive patient histories and pivotal pathological indicators of MASH, including fat, inflammation, fibrosis, and NAS. Our analysis focused on patients aged below 70 years. We excluded data from patients who had undergone bariatric surgery, and control liver tissue samples that exhibited inflammation or fibrosis were also omitted from the study.

### **ChIP seq analysis**

The published ChIP-seq data sets for HNF4A (from GSM469863 and GSM469864) and H3K4me4 (GSM2534178 and GSM2534179) were downloaded from GEO database. Each sequencing read was aligned to the hg38 assembly using Bowtie2. The ChIP-seq peaks were identified and visualized by preparing custom tracks on the University of California, Santa Cruz, (UCSC) genome browser using HOMER.

### **Flowcytometry sorting and analysis**

Antibodies were sourced from BioLegend and BD Biosciences. We utilized the following markers and clones: CD11b (M1/70), CD45 (30-F11), F4/80 (BM8), TIMD4 (RMT4-54) and CCR2(SA203G11). Non-parenchymal cells (NPCs) were subjected to density gradient centrifugation using 40% Percoll (1.056 g/mL) at 2000 rpm for 15 minutes, followed by lysis of red blood cells. The collected cell suspensions were stained with the specified antibodies for 20 minutes on ice. After washing, the cells were resuspended in FACS buffer containing 2% FBS, 0.1% sodium azide, and 1 mM EDTA, at a concentration of  $1.5 \times 10^6$  cells/100  $\mu$ L. Data acquisition was performed using a CytoFLEX SRT cell sorter (Beckman Coulter), and analysis was conducted with FlowJo software.

### **Univariate logistic regression and Receiver Operating Characteristic (ROC) analyses**

To identify potential binding targets of PR3, data from GSE13525, encompassing 10 controls (healthy individuals) and 206 cases of metabolic dysfunction-associated steatohepatitis (MASLD), was retrieved from the Gene Expression Omnibus (GEO). Individuals from this cohort, totaling 216, with a NAFLD activity score (NAS) of 4 or greater and a Fibrosis score of 2 or greater, were categorized as ‘at-risk MASH’. Utilizing the 10 cytokines present in the dataset, we performed univariate logistic regression and Receiver Operating Characteristic (ROC) analyses. Additionally, the Area Under the Curve (AUC) estimates were evaluated for statistical significance using the Mann-Whitney U test. To explore the synergistic effects of the cytokines with *SERPINA1*, combined models were developed through multivariable logistic regression, specifically analyzing *IL32-SERPINA1* and *CCL20-SERPINA1* gene expression data. To validate the robustness of the model, 1,000-fold bootstrap sampling was applied, maintaining a 6:4 ratio for discovery to validation. The statistical significance of differences in the AUC of the combined model and genes was determined through pairwise t-tests. All statistical computations were executed in R software (version 4.3).

### **Gene-disease analysis**

In order to investigate the clinical effects of *IL32*, gene-diseases relationship analysis (GDA) was conducted using DisGeNET plug-in in Cytoscape software.

## Supplementary Figure 1

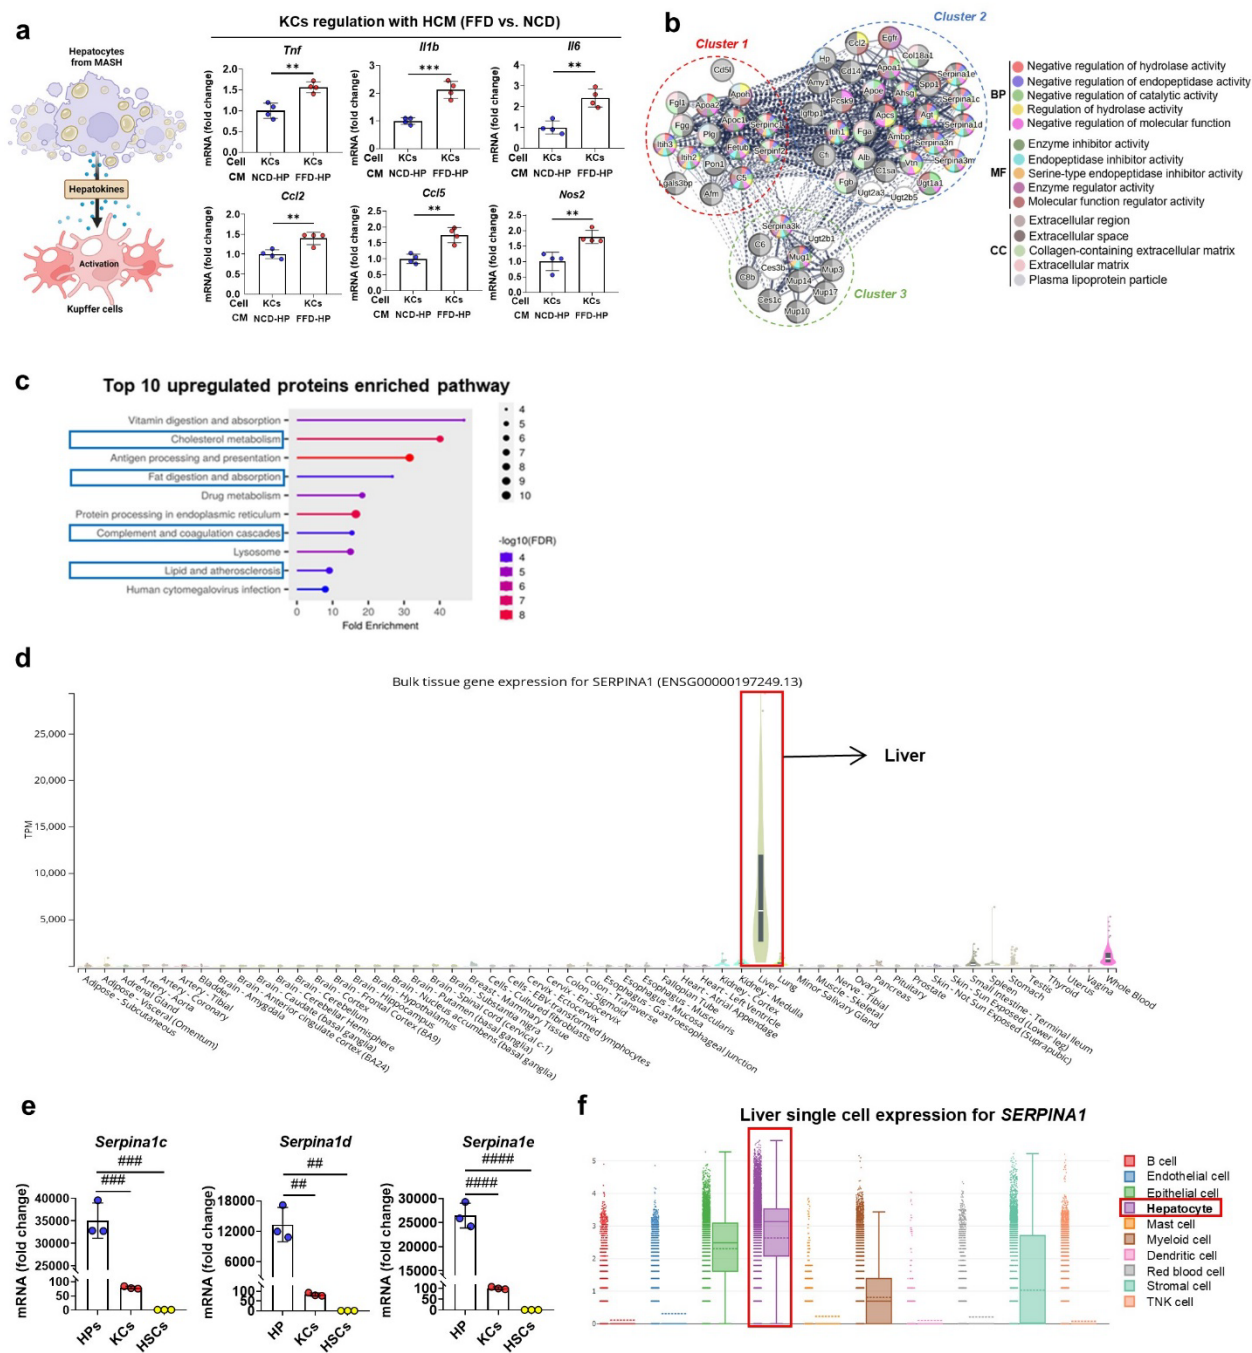

**Supplementary Fig. 1 Additional analysis of secretome proteomics and *Serpina1c-e* mRNA expression in murine MASLD models.**

**a** Hepatocyte condition media (HCM) from NCD- or FFD-fed mice are co-treated with LPS on Kupffer cells (KCs), followed by measurement of relative mRNA levels of pro-inflammatory genes. **b** String based protein-protein interaction analysis of differentially secreted proteins. **c**



Enrichment analysis of upregulated proteins revealed in the secretome proteomics study. Enrichment analysis figure was generated by ShinyGO 0.77. **d** Human tissue bulk gene expression of A1AT (*SERPINA1*) in different organs based on GTEx portal. **e** Relative mRNA expression of *Serpina1c-e* in three major cell types of the liver: hepatocytes (HP), KCs, and hepatic stellate cells (HSCs). **f** Human liver single cell gene expression of A1AT (*SERPINA1*) based on Single Cell Portal, Broad Institute. Data are mean  $\pm$ SD; \*, #  $P < 0.05$ , \*\*, ##  $p < 0.01$ , \*\*\*, ###  $p < 0.001$  and \*\*\*\*, ####  $p < 0.0001$  vs. control model. ns, not significant.

**Supplementary Figure 2**

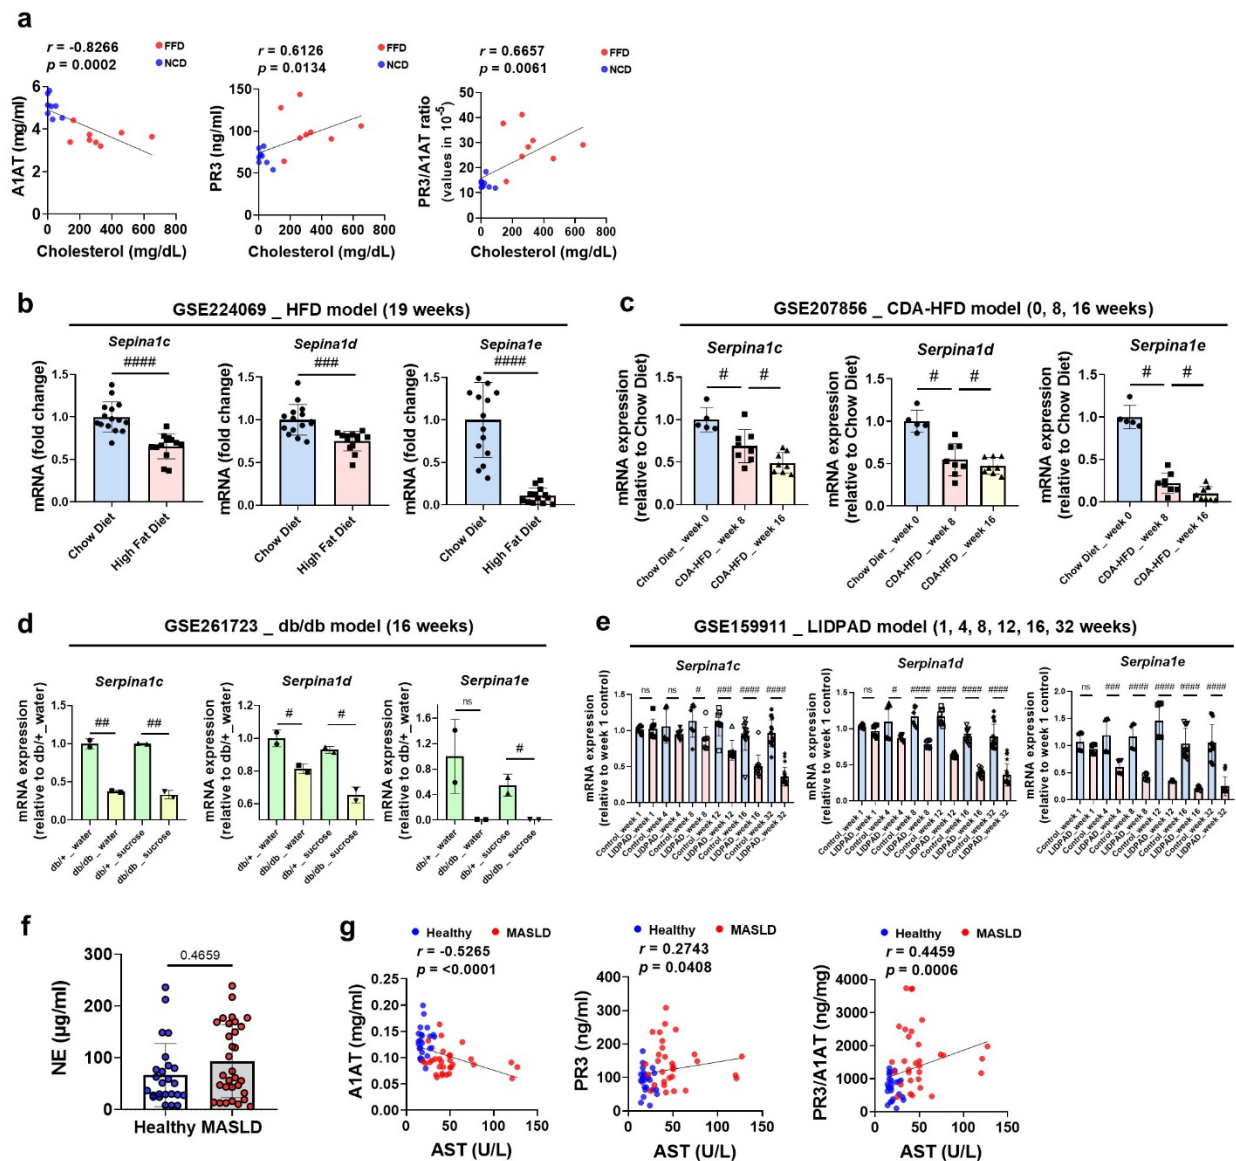

**Supplementary Fig. 2 Additional analysis of A1AT (*SERPINA1*) expression in control groups (healthy) and patients with MASLD.**

**a** Correlation of A1AT, PR3, and PR3/A1AT ratio with serum cholesterol levels in NCD- and FFD-fed mice. **b-e** GEO database analysis of different murine MASLD models for *Serpina1c-e* mRNA expression in murine hepatic tissue (GSE224069, GSE207856, GSE261723, GSE159911). **f** Detection of serum levels of neutrophil elastase for the control group (healthy) and patients with MASLD using ELISA. **g** Correlation of A1AT, PR3, and PR3/A1AT ratio with serum AST levels in the control group (healthy) and patients with MASLD. Data are mean  $\pm$ SD; \*, #  $P < 0.05$ , \*\*, ##  $p < 0.01$ , \*\*\*, ###  $p < 0.001$  and \*\*\*\*, #####  $p < 0.0001$  vs. control model. ns, not significant.

**Supplementary Figure 3**

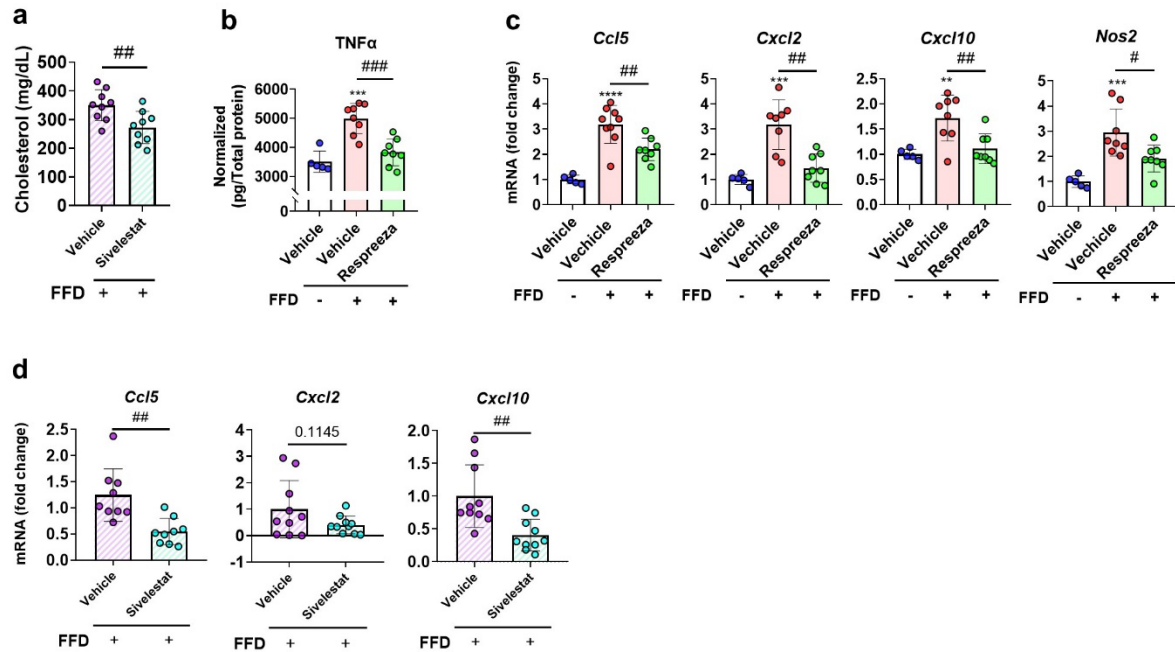

**Supplementary Fig. 3 Additional supporting data for *in vivo* studies with Respreeza® and sivelestat.**

**a** Serum cholesterol levels in FFD-fed vehicle mice (n = 10) and FFD-fed sivelestat-treated mice (n = 10). **b** ELISA analysis showing hepatic tissue levels of TNF- $\alpha$  in NCD-fed vehicle (n = 5), FFD-fed vehicle (n = 8), and FFD-fed Respreeza®-treated mice (n = 8). **c** Relative mRNA expression of additional pro-inflammatory genes in hepatic tissues of NCD-fed vehicle, FFD-fed vehicle, and FFD-fed Respreeza®-treated mice. **d** Relative mRNA expression of additional pro-

inflammatory genes in hepatic tissues of FFD-fed vehicle and FFD-fed sivelestat-treated mice. Data are mean  $\pm$ SD; \*, #  $P < 0.05$ , \*\*, ##  $p < 0.01$ , \*\*\*, ###  $p < 0.001$  and \*\*\*\*, #####  $p < 0.0001$  vs. control model. ns, not significant.

#### Supplementary Figure 4

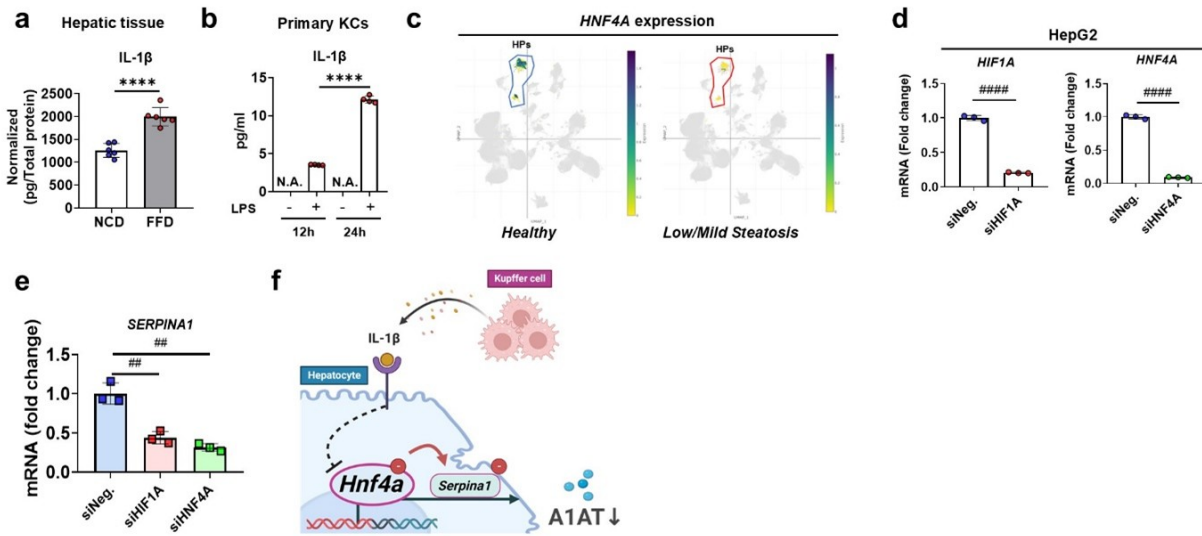

#### Supplementary Fig. 4 Inflammation mediated by Kupffer cells (KCs) leads to the downregulation of A1AT, which is regulated by the transcription factor HNF4 $\alpha$ .

**a** Hepatic expression of interleukin (IL)-1 $\beta$  protein in tissue from NCD- and FFD-fed mice. **b** Detection of IL-1 $\beta$  in conditioned media of primary KCs stimulated with LPS using Enzyme-linked immunosorbent assay (ELISA). **c** Human liver single cell gene expression of *HNF4A* comparing control group (healthy) and patient diagnosed with low/mild steatosis based on Single Cell Portal, Broad Institute. **d** Relative mRNA expression of *HIF1A*, *HNF4A* in HepG2 cells transfected with siHIF1a, siHNF4a, and siNegative control (siNeg.). **e** Relative mRNA expression of A1AT in HepG2 cells transfected with siHIF1a, siHNF4a, and siNegative control (siNeg.). **f** Graphical depiction of how IL- $\beta$  downregulates *Hnf4a*, and subsequently, *Serpina1* expression and its production. Data are mean  $\pm$ SD; \*, #  $P < 0.05$ , \*\*, ##  $p < 0.01$ , \*\*\*, ###  $p < 0.001$  and \*\*\*\*, #####  $p < 0.0001$  vs. control model. ns, not significant.

Supplementary Figure 5

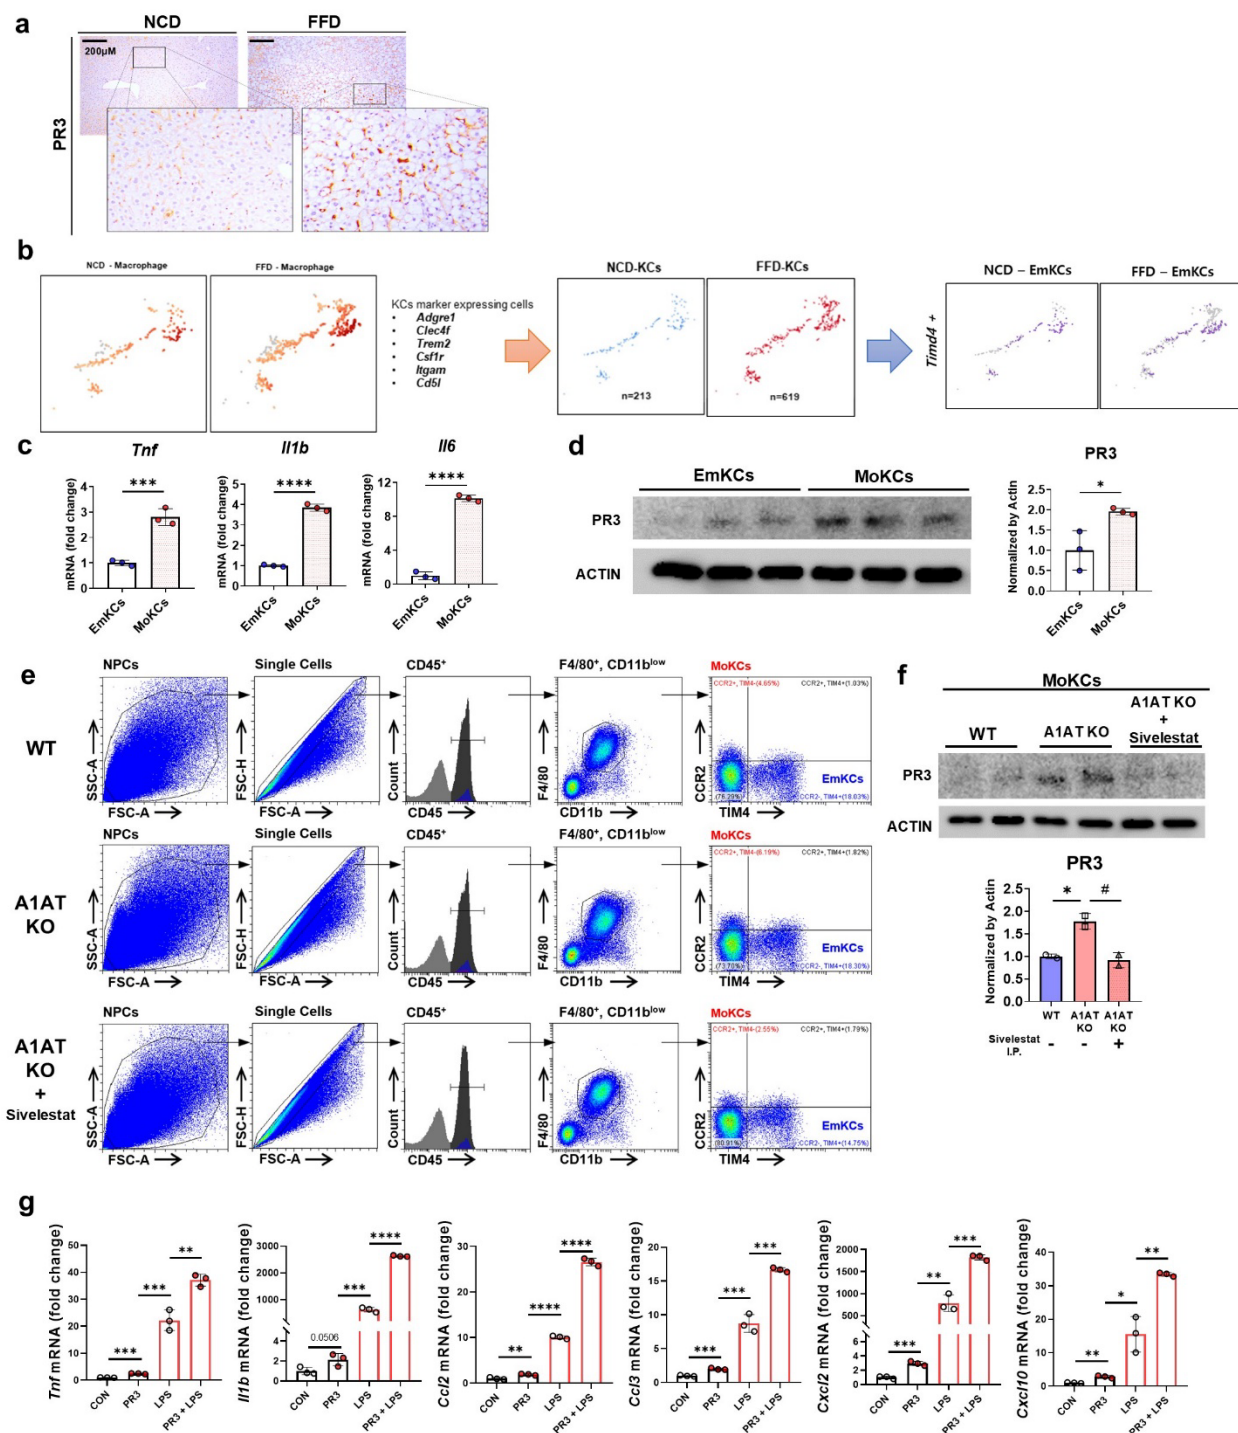

Supplementary Fig. 5 Further characterization of replenishment of PR3 positive cells in FFD-fed mice, and pro-inflammatory role of PR3

**a** PR3-positive cells in liver tissues of NCD- and FFD-fed mice. **b** scRNA-seq analysis of embryo-derived Kupffer cells (EmKCs) across NPC populations in NCD- and FFD-fed mice. **c** Relative mRNA expression of pro-inflammatory genes in EmKCs and MoKCs. **d** Protein expression of PR3 and Actin in EmKCs and MoKCs. **e** Flow cytometry gating strategy for identifying MoKCs (CD45<sup>+</sup>, F4/80<sup>+</sup>, CD11b<sup>low</sup>, CCR2<sup>+</sup>) , EmKCs (CD45<sup>+</sup>, F4/80<sup>+</sup>, CD11b<sup>low</sup>, TIM4<sup>+</sup>) in WT, A1AT KO, and A1AT KO mice treated with Sivelestat. **f** Protein expression of PR3 and Actin in MoKCs of WT, A1AT KO, and A1AT KO mice treated with sivelestat. **g** Relative mRNA abundance of pro-inflammatory genes in immortalized mouse KCs treated with PR3 and LPS. Data are mean  $\pm$ SD; \*, # P<0.05, \*\*, ## p<0.01, \*\*\*, ### p<0.001 and \*\*\*\*, ##### p<0.0001 vs. control model. ns, not significant.



**a**

**b**

14

**a, b** Proteome profiling of human cytokine array analysis indicates all cytokines considered binding partners of endogenously secreted PR3 in conditioned media from LPS-stimulated or non-stimulated THP-1 cells (CTRL) and analyzed by framed spots on the array blots. The bar graph indicates the average signal intensities of framed spots on the array blots. **c** Human tissue gene expression of PR3 bound cytokines in different organs based on GTEx portal. **d** The comparison of the combined predictive model with the single gene signatures (*CCL20* and *IL32*) in two independent cohorts (discovery n=130, validation n=86). **e, f** The comparison of the combined predictive model with the single gene signatures (*SERPINA1* and *IL32*) in two independent cohorts (discovery n=130, validation n=86). Bar charts depict the AUC for each score alongside its standard error, as determined through ROC analysis. **g** Human hepatic tissue expression of IL32 in accordance with NAS and fibrosis score using transcriptomic dataset GSE135251. **h, i** Unique cell marker expressions (h) of KC, macrophage and T-cell and correlation matrix (i) between *IL32* (target gene) and other unique cell markers in KCs, macrophages, and T-cells analyzed from GEO databases [GSE48452 and GSE61260]. **j** Relative mRNA expression of *IL32 $\gamma$*  in immortalized mouse Kupffer cells (ImKCs) transfected with IL-32 $\gamma$  and empty vector (EV). **k** Protein expression of IL-32 $\gamma$  in immortalized mouse Kupffer cells (ImKCs) transfected with IL-32 $\gamma$  and EV. pcDNA3.1+ was used as the internal control vector. **l** Co-IP was performed by pull-down of endogenous PR3 in IL-32 $\gamma$  OV ImKCs (IL-32 $\gamma$  OV) and empty vector-transfected ImKCs (EV). **m** Amplification, melt peak, and melt curve of real-time PCR data of hepatic tissue samples from hIL-32 $\gamma$  Tg and wild-type (WT) mice. **n** Hepatic protein expression of IL-32 $\gamma$  in WT, NCD-, and FFD-fed hIL-32 $\gamma$  Tg mice. Data are mean  $\pm$ SD; \*, # P<0.05, \*\*, ## p<0.01, \*\*\*, ### p<0.001 and \*\*\*\*, #### p<0.0001 vs. control model. ns, not significant.

## Supplementary Figure 7

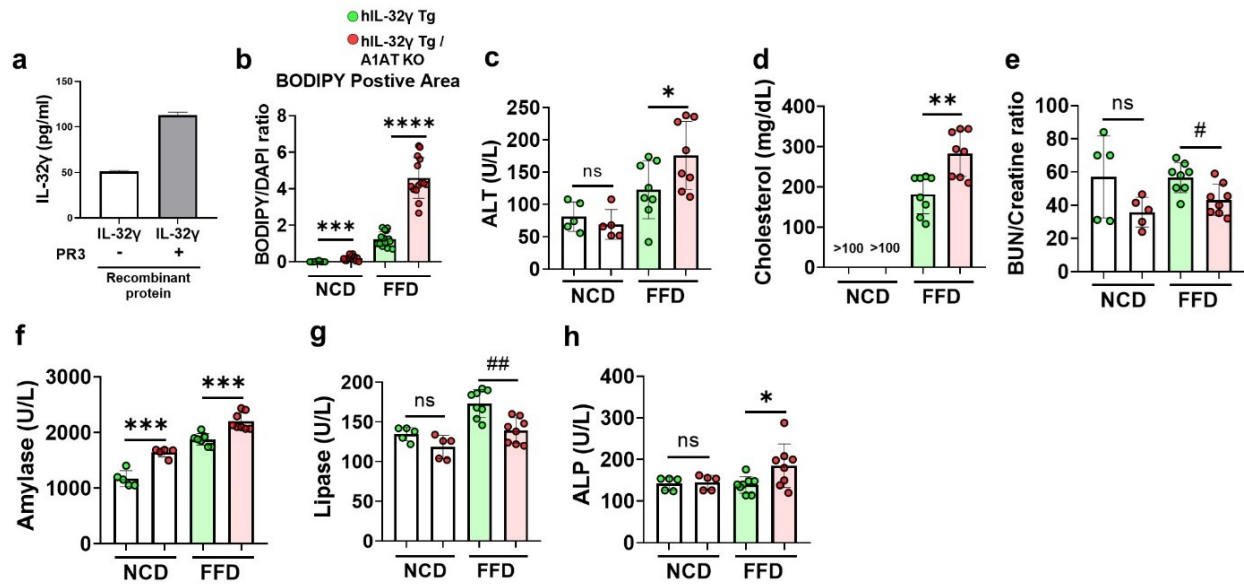

## Supplementary Fig. 7 Additional characterization of IL-32γ Tg/A1AT KO mice in FFD model

**a** ELISA analysis of IL-32γ and PR3-cleaved IL-32γ. **b** Quantification of BODIPY-stained liver sections. Each representative image of a BODIPY-stained section was selected and measured to determine the BODIPY-positive area (green: for lipid accumulation) and DAPI-positive area (blue: for nuclei and normalization). **c-h** Serum levels of ALT (c), Cholesterol (d), BUN/creatinine ratio (e), amylase (f), lipase (g), and ALP (h) in NCD-fed hIL-32γ Tg mice (n = 5), NCD-fed hIL-32γ Tg/A1AT KO mice (n = 5), FFD-fed hIL-32γ Tg mice (n = 8), and FFD-fed hIL-32γ Tg/A1AT KO mice (n = 8). Data are mean ±SD; \*, # P<0.05, \*\*, ## p<0.01, \*\*\*, ### p<0.001 and \*\*\*\*, #### p<0.0001 vs. control model. ns, not significant.



## Supplementary Figure 8

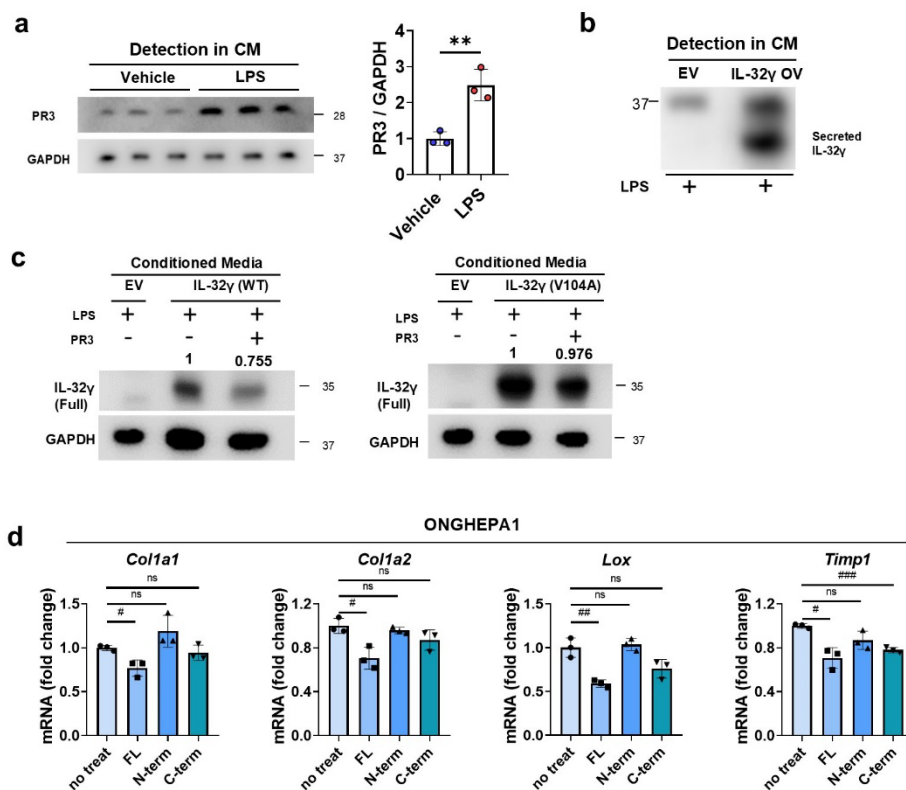

## Supplementary Fig. 8 Characteristics of PR3 mediated cleaved domains of IL-32γ.

**a** Immunoblot analysis of PR3 secreted in LPS-stimulated ImKCs and non-stimulated ImKCs (vehicle). **b** Immunoblot analysis of secreted IL-32γ detection in cell soup (CM) of IL-32γ overexpressed (OV) ImKCs and EV ImKCs. **c** PR3 degradation analysis of secreted IL-32γ in ImKCs transfected with IL-32γ vector, as determined using an immunoblot assay. PR3 cleavage analysis of secreted IL-32γ in ImKCs transfected with point-mutated vector (valine 104 to alanine), as determined using an immunoblot assay. **d** Relative mRNA abundance of pro-fibrogenic genes in ONGHEPA1 cell lines treated with full-length (FL)-rhIL-32γ (100 ng/ml), C-terminal (100 ng/ml), and N-terminal domain (100 ng/ml) of IL-32γ for 48hours. Data are mean  $\pm$ SD; \*, #  $P < 0.05$ , \*\*, ##  $p < 0.01$ , \*\*\*, ###  $p < 0.001$  and \*\*\*\*, ####  $p < 0.0001$  vs. control model. ns, not significant.

### Raw Data from Secretome Proteomics Analysis

| Accession | Protein name                                           | Gene name | Trial 1 ratio (FFD/NCD) | Trial 2 ratio (FFD/NCD) | Trial 1 p-value | Trial 2 p-value | secreted (1) or not (0) | MEAN     |
|-----------|--------------------------------------------------------|-----------|-------------------------|-------------------------|-----------------|-----------------|-------------------------|----------|
| Q9QWK4    | CD5 antigen-like                                       | Cd5l      | 2.04452                 | 4.81592                 | 0.009679        | 0.009252        | 1                       | 3.43022  |
| P34928    | Apolipoprotein C-I                                     | Apoc1     | 2.55058                 | 2.67819                 | 0.009507        | 0.002105        | 1                       | 2.614385 |
| P06728    | Apolipoprotein A-IV                                    | Apoa4     | 1.05559                 | 2.6784                  | 0.001031        | 0.001486        | 1                       | 1.866995 |
| Q547B5    | Osteopontin                                            | Spp1      | 1.95407                 | 1.45526                 | 0.00138         | 0.007909        | 1                       | 1.704665 |
| Q8HWB2    | Histocompatibility 2, Q region locus 4                 | H2-Q4     | 1.3462                  | 1.95739                 | 0.048429        | 0.012419        | 1                       | 1.651795 |
| Q07797    | Galectin-3-binding protein                             | Lgals3bp  | 1.32737                 | 1.95679                 | 9.82E-05        | 0.002226        | 1                       | 1.64208  |
| F6ZIS7    | Retinoic acid receptor responder                       | Rarres1   | 1.4278                  | 1.76577                 | 0.000272        | 0.002988        | 1                       | 1.596785 |
| Q3TXU4    | Apolipoprotein E                                       | ApoE      | 1.5042                  | 1.62891                 | 0.004028        | 0.001568        | 1                       | 1.566555 |
| P09103    | Protein disulfide-isomerase                            | P4hb      | 2.35113                 | 0.773452                | 0.001117        | 0.002525        | 1                       | 1.562291 |
| O08601    | Microsomal triglyceride transfer protein large subunit | Mttp      | 2.31102                 | 0.719639                | 0.00795         | 0.003473        | 1                       | 1.51533  |
| P06745    | Glucose-6-phosphate isomerase                          | Gpi       | 1.62202                 | 1.28758                 | 0.004777        | 0.007272        | 1                       | 1.4548   |
| F8WI14    | Extracellular matrix protein 1                         | Ecm1      | 1.11182                 | 1.77189                 | 0.009406        | 0.002763        | 1                       | 1.441855 |
| P09813    | Apolipoprotein A-II                                    | Apoa2     | 1.24134                 | 1.60931                 | 0.012074        | 0.001904        | 1                       | 1.425325 |
| E9PV38    | Carboxylic ester hydrolase                             | Ces2g     | 1.66125                 | 1.18256                 | 3.09E-05        | 0.001844        | 1                       | 1.421905 |
| Q00623    | Apolipoprotein A-I                                     | Apoa1     | 1.2522                  | 1.58281                 | 0.005383        | 0.001355        | 1                       | 1.417505 |
| Q4FJP7    | Monocyte differentiation antigen CD14                  | Cd14      | 1.40812                 | 1.37753                 | 0.000902        | 0.005578        | 1                       | 1.392825 |
| Q4JFI8    | Serum amyloid P-component                              | Apcs      | 1.52847                 | 1.24541                 | 0.000126        | 0.002679        | 1                       | 1.38694  |

|        |                                                         |           |          |          |          |          |   |          |
|--------|---------------------------------------------------------|-----------|----------|----------|----------|----------|---|----------|
| P08003 | Protein disulfide-isomerase A4                          | Pdia4     | 2.06898  | 0.70292  | 0.007061 | 0.00327  | 1 | 1.38595  |
| Q8BHN3 | Neutral alpha-glucosidase AB                            | Ganab     | 1.82636  | 0.937673 | 0.004281 | 0.005001 | 1 | 1.382017 |
| O88569 | Heterogeneous nuclear ribonucleoproteins A2/B1          | Hnrnpa2b1 | 2.05259  | 0.669707 | 0.006311 | 0.034868 | 1 | 1.361149 |
| Q5SVU3 | C-C motif chemokine 2                                   | Ccl2      | 1.33839  | 1.37948  | 0.006715 | 0.005532 | 1 | 1.358935 |
| Q3U9T8 | C-C motif chemokine 9                                   | Ccl9      | 0.817947 | 1.86302  | 0.004169 | 0.029165 | 1 | 1.340484 |
| P14211 | Calreticulin                                            | Calr      | 1.98186  | 0.653448 | 0.003006 | 0.002733 | 1 | 1.317654 |
| Q3U6J9 | Palmitoyl-protein thioesterase 1                        | Ppt1      | 1.77139  | 0.840694 | 0.001567 | 0.003148 | 1 | 1.306042 |
| Q9QXT0 | Protein canopy homolog 2                                | Cnpy2     | 1.95311  | 0.655238 | 0.009231 | 0.002379 | 1 | 1.304174 |
| Q922R8 | Protein disulfide-isomerase A6                          | Pdia6     | 1.6982   | 0.821612 | 0.01355  | 0.016379 | 1 | 1.259906 |
| P20029 | 78 kDa glucose-regulated protein                        | Hspa5     | 1.78513  | 0.731255 | 0.000795 | 0.003056 | 1 | 1.258193 |
| Q6P5E4 | UDP-glucose:glycoprotein glucosyltransferase 1          | Uggt1     | 1.56837  | 0.898188 | 0.016507 | 0.013253 | 1 | 1.233279 |
| P01887 | Beta-2-microglobulin                                    | B2m       | 1.04824  | 1.40447  | 0.001345 | 0.000959 | 1 | 1.226355 |
| H3BL34 | Carboxylesterase 1E                                     | Ces1e     | 1.79587  | 0.648494 | 0.01068  | 0.007684 | 1 | 1.222182 |
| Q03311 | Cholinesterase                                          | Bche      | 1.30015  | 1.13747  | 0.009544 | 0.001829 | 1 | 1.21881  |
| P28843 | Dipeptidyl peptidase 4                                  | Dpp4      | 1.53256  | 0.898168 | 0.020641 | 0.002465 | 1 | 1.215364 |
| P12265 | Beta-glucuronidase                                      | Gusb      | 1.54351  | 0.886525 | 0.007223 | 0.013645 | 1 | 1.215018 |
| Q792Z7 | H-2 class I histocompatibility antigen, D-B alpha chain | H2-D1     | 1.21864  | 1.19805  | 0.033602 | 0.011683 | 1 | 1.208345 |
| Q8BK48 | Pyrethroid hydrolase Ces2e                              | Ces2e     | 1.38495  | 1.02009  | 0.001225 | 0.000505 | 1 | 1.20252  |
| O89017 | Legumain                                                | Lgm       | 1.13079  | 1.23994  | 0.01531  | 0.04793  | 1 | 1.185365 |

|        |                                                         |         |          |          |          |          |   |          |
|--------|---------------------------------------------------------|---------|----------|----------|----------|----------|---|----------|
| Q8QZR4 | Out at first protein homolog                            | Oaf     | 1.02514  | 1.33947  | 0.007585 | 0.001383 | 1 | 1.182305 |
| Q3UAD6 | Endoplasmic                                             | Hsp90b1 | 1.69043  | 0.666805 | 0.004507 | 0.011249 | 1 | 1.178618 |
| Q91XL1 | Leucine-rich HEV glycoprotein                           | Lrg1    | 1.24584  | 1.10185  | 0.015154 | 0.001709 | 1 | 1.173845 |
| Q8R164 | Valacyclovir hydrolase                                  | Bph1    | 1.74749  | 0.577408 | 0.000349 | 0.00344  | 1 | 1.162449 |
| O88968 | Transcobalamin-2                                        | Tcn2    | 0.795393 | 1.50625  | 0.030153 | 0.005162 | 1 | 1.150822 |
| Q8C7G5 | Apolipoprotein A-V                                      | Apoa5   | 0.838456 | 1.41463  | 0.009611 | 0.007446 | 1 | 1.126543 |
| A2APX3 | Cystatin-C                                              | Cst3    | 0.954281 | 1.298    | 0.006628 | 0.01072  | 1 | 1.126141 |
| Q9JKR6 | Hypoxia up-regulated protein 1                          | Hyou1   | 1.44871  | 0.798333 | 0.020953 | 0.001179 | 1 | 1.123522 |
| Q5I0U6 | Serum amyloid A protein                                 | Saa1    | 1.59493  | 0.643721 | 0.026929 | 0.000345 | 1 | 1.119326 |
| Q3TH01 | H-2 class I histocompatibility antigen, K-B alpha chain | H2-K1   | 0.937621 | 1.29072  | 0.002633 | 0.010686 | 1 | 1.114171 |
| Q9WUZ9 | Ectonucleoside triphosphate diphosphohydrolase 5        | Entpd5  | 1.30454  | 0.919649 | 0.022347 | 0.027467 | 1 | 1.112095 |
| P11672 | Neutrophil gelatinase-associated lipocalin              | Lcn2    | 1.20755  | 1.01593  | 0.002445 | 0.004427 | 1 | 1.11174  |
| H7BX99 | Prothrombin                                             | F2      | 1.08204  | 1.13842  | 0.000168 | 0.003245 | 1 | 1.11023  |
| Q8K1I3 | Secreted phosphoprotein 24                              | Spp2    | 0.853069 | 1.35567  | 0.002823 | 0.003545 | 1 | 1.10437  |
| E9Q414 | Apolipoprotein B-100                                    | Apob    | 0.919879 | 1.28328  | 0.002713 | 0.007764 | 1 | 1.10158  |
| Q02819 | Nucleobindin-1                                          | Nucb1   | 1.0149   | 1.18382  | 0.001996 | 0.011213 | 1 | 1.09936  |
| P33587 | Vitamin K-dependent protein C                           | Proc    | 0.90856  | 1.28833  | 0.004325 | 0.002915 | 1 | 1.098445 |
| Q9ESB3 | Histidine-rich glycoprotein                             | Hrg     | 0.953366 | 1.24348  | 0.005066 | 0.002115 | 1 | 1.098423 |
| Q91V80 | Apolipoprotein F                                        | Apof    | 0.886574 | 1.3082   | 0.004196 | 0.000709 | 1 | 1.097387 |

|            |                                                      |            |          |          |          |          |   |          |
|------------|------------------------------------------------------|------------|----------|----------|----------|----------|---|----------|
| O70362     | Phosphatidylinositol-glycan-specific phospholipase D | Gpld1      | 1.0999   | 1.07285  | 0.007625 | 0.003022 | 1 | 1.086375 |
| Q8VCT4     | Carboxylesterase 1D                                  | Ces1d      | 1.58719  | 0.583545 | 0.01015  | 0.009275 | 1 | 1.085368 |
| Q91WU0     | Carboxylesterase 1F                                  | Ces1f      | 1.60072  | 0.568977 | 0.004505 | 0.001427 | 1 | 1.084849 |
| Q64726     | Zinc-alpha-2-glycoprotein                            | Azgp1      | 0.921516 | 1.23179  | 0.006852 | 0.005412 | 1 | 1.076653 |
| Q61147     | Ceruloplasmin                                        | Cp         | 0.898239 | 1.25051  | 0.001198 | 0.002404 | 1 | 1.074375 |
| A0A0R4J1N3 | Apolipoprotein C-III                                 | Apoc3      | 0.9094   | 1.22426  | 0.000414 | 0.001777 | 1 | 1.06683  |
| Q3UCD9     | Cathepsin D                                          | Ctsd       | 0.987811 | 1.14443  | 0.001755 | 0.004405 | 1 | 1.066121 |
| Q9WUU7     | Cathepsin Z                                          | Ctsz       | 1.00421  | 1.12714  | 0.002953 | 0.003808 | 1 | 1.065675 |
| E9PX70     | Collagen alpha-1(XII) chain                          | Col12a1    | 1.35219  | 0.768237 | 0.000223 | 0.001867 | 1 | 1.060214 |
| Q9CPT4     | UPF0556 protein C19orf10 homolog                     | D17Wsu104e | 0.960012 | 1.15886  | 0.017761 | 0.010241 | 1 | 1.059436 |
| P10639     | Thioredoxin                                          | Txn        | 1.32175  | 0.783232 | 0.006192 | 0.012414 | 1 | 1.052491 |
| Q8BND5     | Sulfhydryl oxidase 1                                 | Qsox1      | 0.907953 | 1.19383  | 0.005993 | 0.001038 | 1 | 1.050892 |
| D6RGQ0     | Complement factor H                                  | Cfh        | 0.839653 | 1.25696  | 0.001879 | 0.008347 | 1 | 1.048307 |
| P27773     | Protein disulfide-isomerase A3                       | Pdia3      | 1.3285   | 0.75978  | 0.006749 | 0.012655 | 1 | 1.04414  |
| P10605     | Cathepsin B                                          | Ctsb       | 0.869875 | 1.19917  | 0.004326 | 0.000981 | 1 | 1.034523 |
| Q9WVJ3     | Carboxypeptidase Q                                   | Cpq        | 1.05932  | 0.995558 | 0.001028 | 0.000874 | 1 | 1.027439 |
| O88783     | Coagulation factor V                                 | F5         | 0.875034 | 1.17705  | 0.006654 | 0.008088 | 1 | 1.026042 |
| B8JJN0     | Complement factor B                                  | Gm20547    | 0.887767 | 1.13325  | 0.000826 | 0.0007   | 1 | 1.010509 |
| Q91WP0     | Mannan-binding lectin serine protease 2              | Masp2      | 0.927991 | 1.09124  | 0.032667 | 0.016706 | 1 | 1.009616 |
| Q5M9K1     | Transthyretin                                        | Ttr        | 0.907067 | 1.10892  | 0.005966 | 0.002783 | 1 | 1.007994 |
| P14847     | C-reactive protein                                   | Crp        | 0.94226  | 1.07262  | 0.009911 | 0.001543 | 1 | 1.00744  |
| Q5FW60     | Major urinary protein 20                             | Mup20      | 0.769705 | 1.24514  | 0.005733 | 0.031282 | 1 | 1.007423 |

|        |                                                         |           |          |          |          |          |   |          |
|--------|---------------------------------------------------------|-----------|----------|----------|----------|----------|---|----------|
| P49935 | Pro-cathepsin H                                         | Ctsh      | 1.04392  | 0.967757 | 0.006507 | 0.003102 | 1 | 1.005839 |
| Q8VCS0 | N-acetylmuramoyl-L-alanine amidase                      | Pglyrp2   | 0.821496 | 1.1887   | 5.91E-05 | 0.001672 | 1 | 1.005098 |
| Q91YW3 | DnaJ homolog subfamily C member 3                       | Dnajc3    | 0.963239 | 1.029    | 0.00237  | 0.00041  | 1 | 0.99612  |
| Q3UEK1 | Mannose-binding protein C                               | Mbl2      | 0.785813 | 1.1987   | 0.001736 | 0.003316 | 1 | 0.992257 |
| O09159 | Lysosomal alpha-mannosidase                             | Man2b1    | 0.925814 | 1.0575   | 0.000355 | 0.012346 | 1 | 0.991657 |
| Q6S9I0 | Kininogen 2                                             | Kng2      | 0.743674 | 1.23378  | 0.000857 | 0.000741 | 1 | 0.988727 |
| Q9R182 | Angiopoietin-related protein 3                          | Angptl3   | 0.883213 | 1.09192  | 0.008657 | 0.003504 | 1 | 0.987567 |
| Q05117 | Tartrate-resistant acid phosphatase type 5              | Acp5      | 0.768972 | 1.20109  | 0.027139 | 0.0161   | 1 | 0.985031 |
| P01898 | H-2 class I histocompatibility antigen, Q10 alpha chain | H2-Q10    | 0.76126  | 1.20873  | 0.005809 | 0.013927 | 1 | 0.984995 |
| Q3TKX1 | V-type proton ATPase subunit S1                         | Atp6ap1   | 1.02227  | 0.936351 | 0.027374 | 0.013622 | 1 | 0.979311 |
| Q91X72 | Hemopexin                                               | Hpx       | 0.867959 | 1.08764  | 0.002989 | 0.001475 | 1 | 0.9778   |
| P11087 | Collagen alpha-1(I) chain                               | Colla1    | 0.911669 | 1.03564  | 0.009289 | 0.020886 | 1 | 0.973655 |
| Q549A5 | Clusterin                                               | Clu       | 0.797368 | 1.14035  | 0.004897 | 0.010489 | 1 | 0.968859 |
| A6X935 | Inter alpha-trypsin inhibitor, heavy chain 4            | Itih4     | 0.879536 | 1.05113  | 0.000739 | 0.000254 | 1 | 0.965333 |
| Q8CIF4 | Biotinidase                                             | Btd       | 0.926877 | 1.0035   | 0.027785 | 0.030957 | 1 | 0.965189 |
| Q63880 | Carboxylesterase 3A                                     | Ces3a     | 1.337    | 0.592476 | 0.004252 | 0.005095 | 1 | 0.964738 |
| P10493 | Nidogen-1                                               | Nid1      | 0.731994 | 1.19563  | 0.008627 | 0.018837 | 1 | 0.963812 |
| E9QK54 | Serpin A11                                              | Serpina11 | 0.998547 | 0.926358 | 0.005834 | 0.002539 | 1 | 0.962453 |
| O70570 | Polymeric immunoglobulin receptor                       | Pigr      | 0.843833 | 1.06681  | 0.014318 | 0.017702 | 1 | 0.955322 |

|        |                                        |           |          |          |          |          |   |          |
|--------|----------------------------------------|-----------|----------|----------|----------|----------|---|----------|
| P01029 | Complement C4-B                        | C4b       | 0.853586 | 1.02455  | 0.008881 | 0.002736 | 1 | 0.939068 |
| Q8R121 | Protein Z-dependent protease inhibitor | Serpina10 | 0.825615 | 1.04083  | 0.000748 | 0.001434 | 1 | 0.933223 |
| Q60590 | Alpha-1-acid glycoprotein 1            | Orm1      | 0.916524 | 0.949337 | 0.005718 | 0.000677 | 1 | 0.932931 |
| Q921I1 | Serotransferrin                        | Tf        | 0.788954 | 1.06271  | 0.00301  | 0.010643 | 1 | 0.925832 |
| Q543M3 | Cathepsin L1                           | Ctsl      | 0.783794 | 1.06105  | 0.001773 | 0.007485 | 1 | 0.922422 |
| P22599 | Alpha-1-antitrypsin 1-2                | Serpina1b | 0.859358 | 0.984908 | 0.000348 | 0.000198 | 1 | 0.922133 |
| Q3TBR2 | Coagulation factor X                   | F10       | 0.818148 | 1.0229   | 0.000638 | 0.002316 | 1 | 0.920524 |
| A2AS37 | Expressed sequence AI182371            | AI182371  | 0.767041 | 1.05419  | 0.006697 | 0.000563 | 1 | 0.910616 |
| P97298 | Pigment epithelium-derived factor      | Serpinf1  | 0.8455   | 0.961631 | 0.000791 | 0.001498 | 1 | 0.903566 |
| D3YTY9 | Kininogen-1                            | Kng1      | 0.659818 | 1.12343  | 0.001017 | 0.003157 | 1 | 0.891624 |
| P49182 | Heparin cofactor 2                     | Serpind1  | 0.721604 | 1.05478  | 0.002116 | 0.000904 | 1 | 0.888192 |
| Q3TUF3 | Calumenin                              | Calu      | 0.904857 | 0.843621 | 0.00376  | 0.028054 | 1 | 0.874239 |
| P07361 | Alpha-1-acid glycoprotein 2            | Orm2      | 0.731972 | 1.00245  | 0.000385 | 0.00518  | 1 | 0.867211 |
| G5E899 | Plasminogen activator inhibitor 1      | Serpine1  | 0.778116 | 0.94862  | 0.007563 | 0.001127 | 1 | 0.863368 |
| Q8K2I4 | Beta-mannosidase                       | Manba     | 0.884743 | 0.840665 | 0.000199 | 0.002576 | 1 | 0.862704 |
| B7ZNJ1 | Fibronectin                            | Fn1       | 0.679054 | 1.03397  | 0.004929 | 0.004785 | 1 | 0.856512 |
| P06683 | Complement component C9                | C9        | 0.780983 | 0.92925  | 0.008118 | 0.040377 | 1 | 0.855117 |
| P05367 | Serum amyloid A-2 protein              | Saa2      | 1.16722  | 0.532452 | 0.001156 | 0.006923 | 1 | 0.849836 |
| P01027 | Complement C3                          | C3        | 0.743348 | 0.947018 | 0.001543 | 0.001518 | 1 | 0.845183 |
| E9QQ18 | Proteoglycan 4                         | Prg4      | 0.679972 | 1.00566  | 0.012422 | 0.000655 | 1 | 0.842816 |
| Q9JHH6 | Carboxypeptidase B2                    | Cpb2      | 0.855405 | 0.827508 | 0.014615 | 0.004602 | 1 | 0.841457 |
| Q80YC5 | Coagulation factor XII                 | F12       | 0.700093 | 0.979223 | 0.016091 | 0.001723 | 1 | 0.839658 |

|            |                                              |           |          |          |          |          |   |          |
|------------|----------------------------------------------|-----------|----------|----------|----------|----------|---|----------|
| P97290     | Plasma protease C1 inhibitor                 | Serping1  | 0.733058 | 0.942248 | 0.006652 | 0.014684 | 1 | 0.837653 |
| Q9D1Q6     | Endoplasmic reticulum resident protein 44    | Erp44     | 1.04384  | 0.629999 | 0.005254 | 0.020887 | 1 | 0.83692  |
| Q99KV1     | DnaJ homolog subfamily B member 11           | Dnajb11   | 0.927705 | 0.735371 | 0.039137 | 0.005519 | 1 | 0.831538 |
| O89020     | Afamin                                       | Afm       | 0.732094 | 0.922742 | 0.004607 | 0.016608 | 1 | 0.827418 |
| Q61702     | Inter-alpha-trypsin inhibitor heavy chain H1 | Itih1     | 0.749531 | 0.900243 | 0.003662 | 0.002623 | 1 | 0.824887 |
| Q61730     | Interleukin-1 receptor accessory protein     | Il1rap    | 0.757866 | 0.879799 | 0.009336 | 0.003604 | 1 | 0.818833 |
| Q61129     | Complement factor I                          | Cfi       | 0.727561 | 0.909132 | 0.03009  | 0.037969 | 1 | 0.818347 |
| Q9QXC1     | Fetuin-B                                     | Fetub     | 0.75059  | 0.87121  | 8.95E-05 | 0.002474 | 1 | 0.8109   |
| Q01339     | Beta-2-glycoprotein 1                        | Apoh      | 0.646425 | 0.973584 | 0.004914 | 0.010689 | 1 | 0.810005 |
| Q8CG14     | Complement C1s-A subcomponent                | C1sa      | 0.627032 | 0.989454 | 0.008279 | 0.006796 | 1 | 0.808243 |
| Q03734     | Serine protease inhibitor A3M                | Serpina3m | 0.83729  | 0.767097 | 0.003976 | 0.002533 | 1 | 0.802194 |
| Q61646     | Haptoglobin                                  | Hp        | 0.59905  | 0.998107 | 0.003728 | 0.008036 | 1 | 0.798579 |
| P29788     | Vitronectin                                  | Vtn       | 0.703535 | 0.8806   | 0.005271 | 0.004495 | 1 | 0.792068 |
| P00687     | Alpha-amylase 1                              | Amy1      | 0.72728  | 0.849528 | 0.000263 | 0.000925 | 1 | 0.788404 |
| P39061     | Collagen alpha-1(XVIII) chain                | Col18a1   | 0.646738 | 0.921492 | 0.014931 | 0.0198   | 1 | 0.784115 |
| Q07456     | Protein AMBP                                 | Ambp      | 0.738933 | 0.824178 | 0.010664 | 0.009883 | 1 | 0.781556 |
| Q9DD06     | Retinoic acid receptor responder protein 2   | Rarres2   | 0.705175 | 0.853459 | 0.021217 | 0.019423 | 1 | 0.779317 |
| Q9Z1R3     | Apolipoprotein M                             | Apom      | 0.622733 | 0.882773 | 0.005584 | 0.031497 | 1 | 0.752753 |
| P21614     | Vitamin D-binding protein                    | Gc        | 0.484598 | 1.01567  | 0.006939 | 0.009621 | 1 | 0.750134 |
| A0A0R4J0X5 | Alpha-1-antitrypsin 1-3                      | Serpina1c | 0.756974 | 0.741501 | 0.005008 | 0.008425 | 1 | 0.749238 |



|            |                                                                                 |           |          |          |          |          |   |          |
|------------|---------------------------------------------------------------------------------|-----------|----------|----------|----------|----------|---|----------|
| A0A0R4J0E1 | Fibrinogen-like protein 1                                                       | Fgl1      | 0.776398 | 0.68763  | 0.015769 | 0.013806 | 1 | 0.732014 |
| G3X8T9     | Serine protease inhibitor A3N                                                   | Serpina3n | 0.817154 | 0.63954  | 0.001787 | 0.001223 | 1 | 0.728347 |
| Q9JJH1     | Ribonuclease 4                                                                  | Rnase4    | 0.703282 | 0.75037  | 0.002387 | 0.003945 | 1 | 0.726826 |
| Q61247     | Alpha-2-antiplasmin                                                             | Serpinf2  | 0.653313 | 0.786254 | 0.001811 | 0.009316 | 1 | 0.719784 |
| Q61838     | Alpha-2-macroglobulin                                                           | A2m       | 0.538236 | 0.867365 | 0.00432  | 0.002132 | 1 | 0.702801 |
| P20918     | Plasminogen                                                                     | Plg       | 0.634434 | 0.7614   | 0.000918 | 0.00254  | 1 | 0.697917 |
| Q61703     | Inter-alpha-trypsin inhibitor heavy chain H2                                    | Itih2     | 0.571916 | 0.818447 | 0.002672 | 0.013441 | 1 | 0.695182 |
| P28665     | Murinoglobulin-1                                                                | Mug1      | 0.569547 | 0.820048 | 0.005395 | 0.008677 | 1 | 0.694798 |
| P16301     | Phosphatidylcholine-sterol acyltransferase                                      | Lcat      | 0.481351 | 0.895242 | 0.031305 | 0.021457 | 1 | 0.688297 |
| P06684     | Complement C5                                                                   | C5        | 0.608022 | 0.758318 | 0.004888 | 0.001704 | 1 | 0.68317  |
| Q00897     | Alpha-1-antitrypsin 1-4                                                         | Serpina1d | 0.622752 | 0.739555 | 0.00069  | 0.000837 | 1 | 0.681154 |
| Q61704     | Inter-alpha-trypsin inhibitor heavy chain H3                                    | Itih3     | 0.594167 | 0.765444 | 0.016065 | 0.034705 | 1 | 0.679806 |
| Q91X70     | Complement component 6                                                          | C6        | 0.650345 | 0.703697 | 0.002664 | 0.001472 | 1 | 0.677021 |
| Q543J5     | Antithrombin-III                                                                | Serpinc1  | 0.552902 | 0.779737 | 0.002375 | 0.021326 | 1 | 0.66632  |
| P52430     | Serum paraoxonase/arylesterase 1                                                | Pon1      | 0.796431 | 0.527249 | 8.37E-05 | 0.002997 | 1 | 0.66184  |
| Q8K0E8     | Fibrinogen beta chain                                                           | Fgb       | 0.505452 | 0.81193  | 0.004523 | 0.003733 | 1 | 0.658691 |
| P23953     | Carboxylesterase 1C                                                             | Ces1c     | 0.584191 | 0.718944 | 0.009152 | 0.017511 | 1 | 0.651568 |
| E9PV24     | Fibrinogen alpha chain [Cleaved into: Fibrinopeptide A; Fibrinogen alpha chain] | Fga       | 0.514974 | 0.768713 | 0.001345 | 0.009826 | 1 | 0.641844 |
| A0A0R4J0I1 | MCG1051009                                                                      | Serpina3k | 0.59091  | 0.684522 | 0.000894 | 0.007934 | 1 | 0.637716 |

|        |                                                  |           |          |          |          |          |   |          |
|--------|--------------------------------------------------|-----------|----------|----------|----------|----------|---|----------|
| Q8QZR3 | Pyrethroid hydrolase<br>Ces2a                    | Ces2a     | 0.883747 | 0.385019 | 0.004935 | 0.004238 | 1 | 0.634383 |
| Q3UER8 | Fibrinogen gamma chain                           | Fgg       | 0.493163 | 0.774318 | 0.006685 | 0.01419  | 1 | 0.633741 |
| Q546G4 | Serum albumin                                    | Alb       | 0.433894 | 0.802888 | 0.006671 | 0.022761 | 1 | 0.618391 |
| P11859 | Angiotensinogen                                  | Agt       | 0.641133 | 0.584907 | 0.000715 | 0.006628 | 1 | 0.61302  |
| Q3KQQ2 | Major urinary protein 3                          | Mup3      | 0.626035 | 0.596879 | 0.006649 | 0.000263 | 1 | 0.611457 |
| P47876 | Insulin-like growth<br>factor-binding protein 1  | Igfbp1    | 0.580634 | 0.598306 | 0.001574 | 0.006149 | 1 | 0.58947  |
| Q63886 | UDP-<br>glucuronosyltransferase<br>1-1           | Ugt1a1    | 0.799529 | 0.348491 | 0.000175 | 0.00379  | 1 | 0.57401  |
| Q8VCU1 | Carboxylesterase 3B                              | Ces3b     | 0.756702 | 0.390716 | 0.001796 | 0.001964 | 1 | 0.573709 |
| A2BIN1 | Major urinary protein 6                          | Mup10     | 0.633616 | 0.435789 | 0.000143 | 0.002796 | 1 | 0.534703 |
| Q3UEK9 | Alpha-2-HS-<br>glycoprotein                      | Ahsg      | 0.362459 | 0.660603 | 0.039302 | 0.007872 | 1 | 0.511531 |
| Q80W65 | Proprotein convertase<br>subtilisin/kexin type 9 | Pcsk9     | 0.442256 | 0.575119 | 0.002658 | 0.001096 | 1 | 0.508688 |
| Q8BH35 | Complement component<br>C8 beta chain            | C8b       | 0.466107 | 0.548211 | 0.004736 | 0.003756 | 1 | 0.507159 |
| Q9WVF5 | Epidermal growth factor<br>receptor              | Egfr      | 0.483555 | 0.509544 | 0.003999 | 0.003647 | 1 | 0.49655  |
| Q8BWQ1 | UDP-<br>glucuronosyltransferase<br>2A3           | Ugt2a3    | 0.636476 | 0.256776 | 0.00522  | 0.005175 | 1 | 0.446626 |
| Q8K169 | UDP-<br>glucuronosyltransferase<br>2B17          | Ugt2b5    | 0.632705 | 0.248918 | 0.005666 | 0.010876 | 1 | 0.440812 |
| B5X0G2 | Major urinary protein 17                         | Mup17     | 0.621817 | 0.220358 | 0.01099  | 0.03151  | 1 | 0.421088 |
| Q8R084 | UDP-<br>glucuronosyltransferase                  | Ugt2b1    | 0.454855 | 0.201762 | 0.003923 | 0.03144  | 1 | 0.328309 |
| A2CEK7 | Major urinary protein 12                         | Mup14     | 0.345006 | 0.221362 | 0.001517 | 0.001057 | 1 | 0.283184 |
| Q00898 | Alpha-1-antitrypsin 1-5                          | Serpina1e | 0.145514 | 0.154529 | 0.006621 | 0.007123 | 1 | 0.150022 |

**Supplementary Table 1. The primers for quantitative PCR**

| Mouse            |                          |                             |
|------------------|--------------------------|-----------------------------|
| Gene name        | FOR                      | REV                         |
| <i>Gapdh</i>     | ACGGCAAATTCAACGGCACAG    | AGACTCCACGACATACTCAGCAC     |
| <i>Tnf</i>       | AGGGTCTGGGCCATAGAACT     | CCACCACGCTCTTCTGTCTA        |
| <i>Il1b</i>      | CTCGCAGCAGCACATCAACAAG   | CCACGGGAAAGACACAGGTAGC      |
| <i>Il6</i>       | ACAAAGCCAGAGTCCTTCAGAGAG | TTGGATGGTCTTGGTCCTTAGCC     |
| <i>Il10</i>      | GCTGGACAACATACTGCTAACCG  | TCCGATAAGGCTTGGCAACCC       |
| <i>Arg1</i>      | CTCCAAGCCAAAGTCCTTAGAG   | AGGAGCTGTCATTAGGGACATC      |
| <i>Cd163</i>     | CTGGCGGGTGGTGAAAACA      | CAGCCGTTACTGCACACTG         |
| <i>Nos2</i>      | GCACCACCCTCCTCGTTCAG     | TCCACAACCTCGCTCCAAGATTCC    |
| <i>Ccl2</i>      | ATTGGGATCATCTTGCTGGT     | CCTGCTGTTACAGTTGCC          |
| <i>Ccl3</i>      | TCCCAGCCAGGTGTCATTTTCC   | CAGTCCAGGTCAGTGATGTATTCTTG  |
| <i>Ccl4</i>      | CTCTGCGTGTCTGCCCTCTC     | TGGTCTCATAGTAATCCATCACAAAGC |
| <i>Ccl5</i>      | ACTCCCTGCTGCTTTGCCTAC    | TGTATTCTTGAACCCACTTCTTCTCTG |
| <i>Cxcl2</i>     | AAAGTTTGCTTGACCCTGAA     | CTCAGACAGCGAGGCACATC        |
| <i>Cxcl10</i>    | GACGGTCCGCTGCAACTG       | CTTCCCTATGGCCCTCATTCT       |
| <i>Col1a1</i>    | ACAGGCGAACAAGGTGACAGAG   | GCCAGGAGAACCAGCAGAGC        |
| <i>Col1a2</i>    | GGGCAACAGCAGGTTACCTA     | AATGTCCAGAGGTGCAATGTCAAG    |
| <i>Col3a1</i>    | CAGGCCAGTGGAATGTAAAGA    | CTCATTGCCTTGCGTGTTTGATA     |
| <i>Col4a1</i>    | AGGAGAGAAGGGTGAACAAGGTG  | CCAGGAGTGCCAGGTAAGCC        |
| <i>Col5a1</i>    | CTTCGCCGCTACTCCTGTTC     | CCCTGAGGGCAAATTGTGAAAA      |
| <i>Lox</i>       | GGTACTTCCAGTACGGTCTCC    | GCAGCGCATCTCAGGTTGT         |
| <i>Timp1</i>     | TCTGGCATCTGGCATCCTCTTG   | AACGCTGGTATAAGGTGGTCTCG     |
| <i>Acta2</i>     | TCAGGGAGTAATGGTTGGAATGGG | CAGTTGGTGATGATGCCGTGTTC     |
| <i>Serpina1c</i> | TCGCCCTGGCAAATTACATTC    | GCTGCAATGGTGCACATCAA        |
| <i>Serpina1d</i> | ACCCAGTTCTGGGACAGCAA     | TCCCTGTATAGTCTGAGGGCAAAG    |
| <i>Serpina1e</i> | CCTGCTAAACAGGCGCAGA      | GTCAGCACGGCCTTATGCAC        |
| <i>Hnf1a</i>     | TACCACACTGAGGTTGGTTACTGT | AACTAGCCGAGGAAGAACTATGAACA  |
| <i>Hnf4a</i>     | CACGCGGAGGTCAAGCTAC      | CCCAGAGATGGGAGAGGTGAT       |
| <i>Pr3m</i>      | GAAGTGAACGTCACGGTGGTC    | AAGAATGCCATTGCAGATCAAG      |
| Human            |                          |                             |
| Gene name        | FOR                      | REV                         |

|                                 |                       |                         |
|---------------------------------|-----------------------|-------------------------|
| <i>GAPDH</i>                    | ATCACCATCTTCCAGGAGCG  | GGCCTCACCCCATTTGATGT    |
| <i>IL-32<math>\gamma</math></i> | AGGCCCGAATGGTAATGCT   | CCACAGTGTCTCAGTGTCA     |
| <i>SERPINA1</i>                 | AGAGGGCCAGCTAAGTGGTA  | GAGGCTGCGAAAGGAGTCAT    |
| <i>HIF1<math>\alpha</math></i>  | CACCACAGGACAGTACAGGAT | CGTGCTGAATAATACCACTCACA |
| <i>HNF4<math>\alpha</math></i>  | CAGGCTCAAGAAATGCTTC   | GGCTGCTGTCTCATAGCTT     |

**Supplementary Table 2. Lists of Antibodies**

| Antibody                        |                          |              |
|---------------------------------|--------------------------|--------------|
| Protein                         | Company                  | Product Code |
| IL-32                           | YbdY                     | PAB102       |
| ACTIN                           | Merk                     | MAB1501      |
| GAPDH                           | Merk                     | AB2302       |
| PR3                             | Santa Cruz               | sc-74534     |
| A1AT                            | ABclonal                 | A1015        |
| HIF1 $\alpha$                   | Santa Cruz               | sc-13515     |
| HNF4 $\alpha$                   | Santa Cruz               | sc-374229    |
| HNF4 $\alpha$                   | Santa Cruz               | sc-374229 X  |
| APC anti-mouse CD45             | BioLegend                | 103112       |
| APC/Cyanine7 anti-mouse F4/80   | BioLegend                | 123118       |
| PE/Cyanine7 anti-mouse Tim-4    | BioLegend                | 130010       |
| Pharmingen™ FITC Rat Anti-CD11b | BD Biosciences           | 553310       |
| PE anti-mouse CD192 (CCR2)      | BioLegend                | 150610       |
| JNK1/2/3                        | ABclonal                 | A4867        |
| p-JNK                           | ABclonal                 | AP0276       |
| ERK                             | Santa Cruz               | sc-514302    |
| p-ERK                           | Santa Cruz               | sc-7383      |
| I $\kappa$ B- $\alpha$          | ABclonal                 | A19714       |
| p-I $\kappa$ B- $\alpha$        | Cell signaling           | 2859         |
| P65                             | ABclonal                 | A11201       |
| p-P65                           | Cell signaling           | 3033S        |
| CLEC4F                          | R&D Systems              | AF2784       |
| PR3                             | ABclonal                 | A19748       |
| F4/80                           | Thermo Fisher Scientific | 13-4801-82   |

|                                                                                   |             |         |
|-----------------------------------------------------------------------------------|-------------|---------|
| Chicken anti-Rabbit IgG (H+L) Cross-Adsorbed Secondary Antibody, Alexa Fluor™ 488 | Invitrogen  | A-21441 |
| Goat IgG (H+L) PE-conjugated Antibody                                             | R&D Systems | F0107   |

## References

- 1 Casimiro, I., Stull, N. D., Tersey, S. A. & Mirmira, R. G. Phenotypic sexual dimorphism in response to dietary fat manipulation in C57BL/6J mice. *J Diabetes Complications* **35**, 107795 (2021). <https://doi.org:10.1016/j.jdiacomp.2020.107795>
- 2 Oraha, J., Enriquez, R. F., Herzog, H. & Lee, N. J. Sex-specific changes in metabolism during the transition from chow to high-fat diet feeding are abolished in response to dieting in C57BL/6J mice. *Int J Obes (Lond)* **46**, 1749-1758 (2022). <https://doi.org:10.1038/s41366-022-01174-4>
- 3 Kim, H. S. *et al.* Reversion of in vivo fibrogenesis by novel chromone scaffolds. *EBioMedicine* **39**, 484-496 (2019). <https://doi.org:10.1016/j.ebiom.2018.12.017>
